# Supplementary material for: Outcomes and toxicities in patients with diffuse-large B cell lymphoma involving the gastrointestinal tract and digestive organs
Source: PubMed Central journal article supplement (PMC11422352; doi:10.3389/fonc.2024.1447020), 2024-09-11
Supplement: DataSheet1.pdf [file DataSheet1.pdf]

## Supplementary Material

**Supplementary Figure 1. Patient inclusion and exclusion criteria.** 85 patients were excluded owing to a number of factors, yielding a final cohort of 204 patients who were analyzed. *Abbreviations:* RT = radiation therapy.

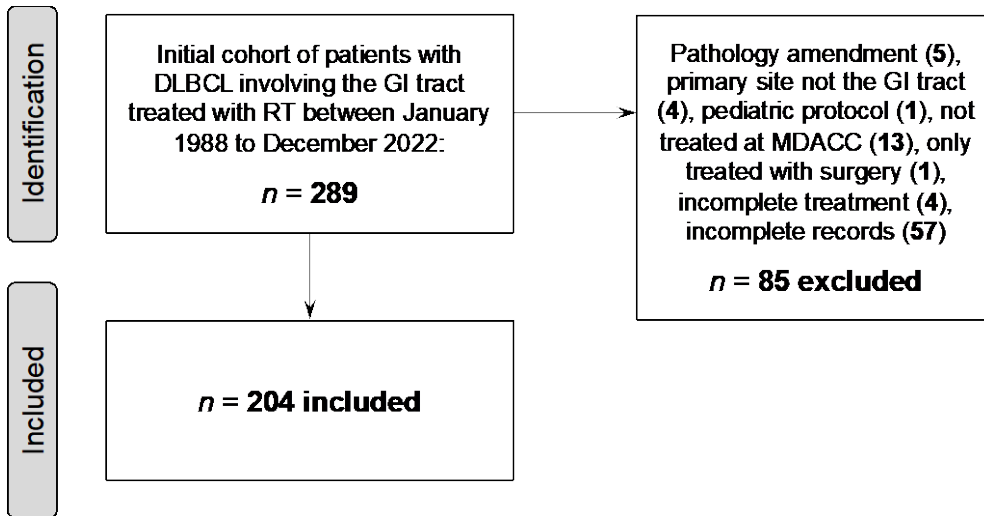

**Supplementary Figure 2. Gastrointestinal comorbidities among all patients.** The most common comorbidities included GERD, followed by colorectal cancer, and liver disease.

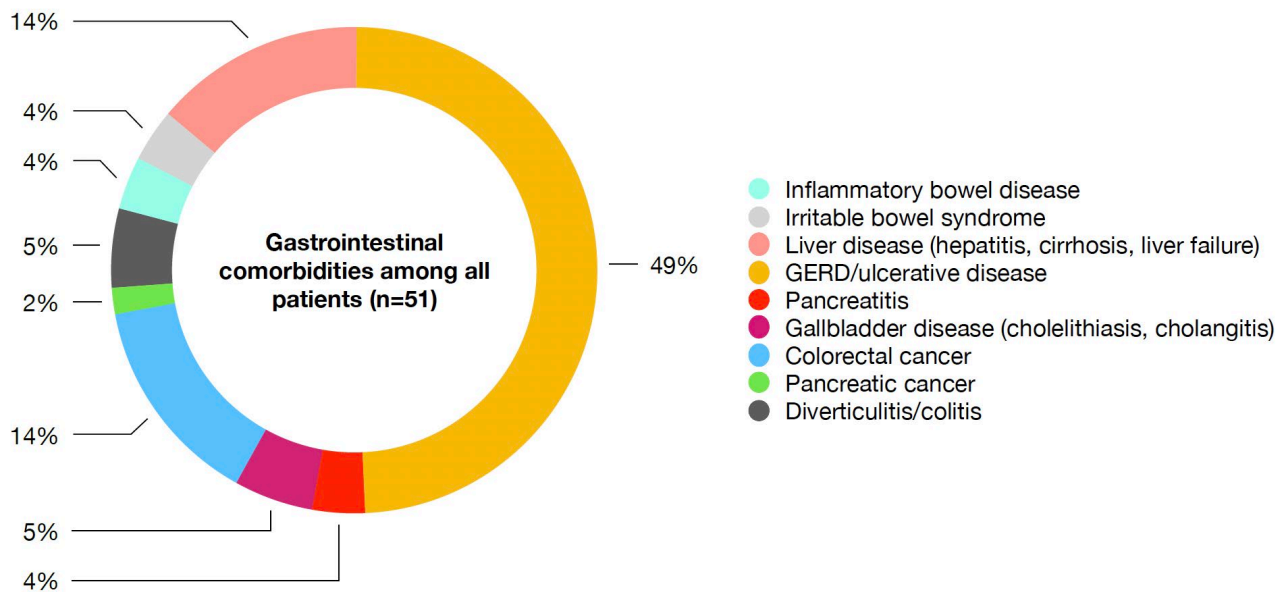

**Supplementary Figure 3. Survival outcomes of patients with DLBCL of the GI tract treated only in the post-rituximab era.** Overall survival of the full post-rituximab cohort (A), stratified by stage (B), and receipt of chemotherapy vs. chemoradiation (C). Also depicted are progression-free survival of the full post-rituximab cohort (D), as well as analyses stratified by stage (E), and chemotherapy vs. chemoradiation disposition (F). \* $p < 0.05$ , \*\* $p < 0.01$ , \*\*\* $p < 0.001$ , \*\*\*\* $p < 0.0001$ .

## POST-RITUXIMAB COHORT ONLY

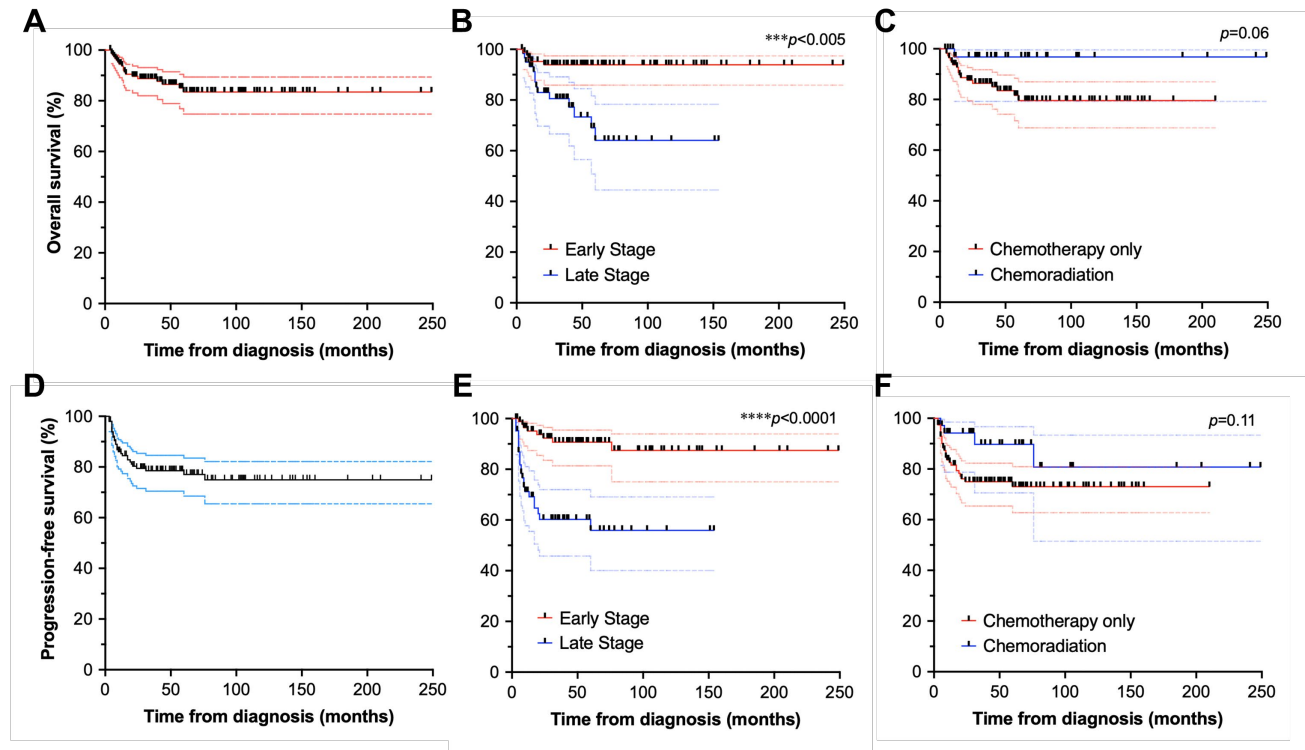

**Supplementary Figure 4. Survival outcomes of patients with DLBCL of the GI tract treated with CMT.** Patients treated with systemic therapy alone were excluded from this analysis. Overall survival of the full CMT cohort (A), also stratified by stage (B). Also depicted are progression-free survival of the full CMT cohort (C), as well as an analysis stratified by stage (D). \* $p < 0.05$ , \*\* $p < 0.01$ , \*\*\* $p < 0.001$ , \*\*\*\* $p < 0.0001$ .

COMBINED MODALITY THERAPY (CMT) COHORT ONLY

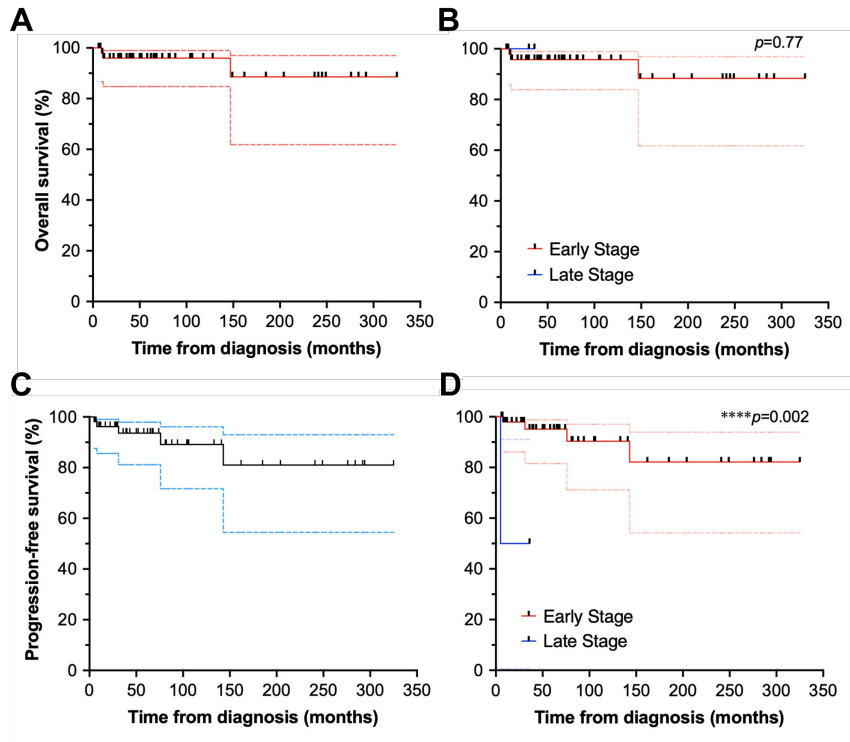

Supplementary Table 1. Summary of chemotherapies received.

|                          | All patients,<br><i>n</i> =204<br><i>n</i> (%) | Early stage DLBCL,<br><i>n</i> =125 (61.3%)<br><i>n</i> (%) | Advanced stage DLBCL,<br><i>n</i> =75 (36.8%)<br><i>n</i> (%) |
|--------------------------|------------------------------------------------|-------------------------------------------------------------|---------------------------------------------------------------|
| <b>Systemic line 1</b>   |                                                |                                                             |                                                               |
| <i>Without rituximab</i> | <u>Subtotal: 38 (18.6)</u>                     | <u>Subtotal: 31 (24.8)</u>                                  | <u>Subtotal: 8 (10.7)</u>                                     |
| <b>CHOP</b>              | 31 (15.2)                                      | 27 (21.6)                                                   | 4 (5.3)                                                       |
| <b>EPOCH</b>             | 3 (1.5)                                        | 1 (0.8)                                                     | 2 (2.7)                                                       |
| <b>HCVAD</b>             | 4 (2.0)                                        | 3 (2.4)                                                     | 2 (2.7)                                                       |
| <i>With rituximab</i>    | <u>Subtotal: 151 (74.0)</u>                    | <u>Subtotal: 87 (69.6)</u>                                  | <u>Subtotal: 61 (81.3)</u>                                    |
| <b>R-CHOP</b>            | 114 (55.9)                                     | 75 (60.0)                                                   | 37 (49.3)                                                     |
| <b>R-EPOCH</b>           | 31 (15.2)                                      | 9 (7.2)                                                     | 22 (29.3)                                                     |
| <b>R-HCVAD</b>           | 6 (2.9)                                        | 3 (2.4)                                                     | 2 (2.7)                                                       |
| <i>Other</i>             | 15 (7.4)                                       | 5 (4.0)                                                     | 6 (8.0)                                                       |
| <b>Systemic line 2</b>   |                                                |                                                             |                                                               |
| <i>Without rituximab</i> | <u>Subtotal: 2 (1.0)</u>                       | <u>Subtotal: 1 (0.8)</u>                                    | <u>Subtotal: 1 (1.3)</u>                                      |
| <b>CHOP</b>              | 2 (1.0)                                        | 1 (0.8)                                                     | 1 (1.3)                                                       |
| <b>EPOCH</b>             | 0 (0.0)                                        | 0 (0.0)                                                     | 0 (0.0)                                                       |
| <b>HCVAD</b>             | 0 (0.0)                                        | 0 (0.0)                                                     | 0 (0.0)                                                       |
| <i>With rituximab</i>    | <u>Subtotal: 8 (3.9)</u>                       | <u>Subtotal: 3 (2.4)</u>                                    | <u>Subtotal: 5 (6.7)</u>                                      |
| <b>R-CHOP</b>            | 3 (1.5)                                        | 1 (0.8)                                                     | 2 (2.7)                                                       |
| <b>R-EPOCH</b>           | 5 (2.5)                                        | 2 (1.6)                                                     | 3 (4.0)                                                       |
| <b>R-HCVAD</b>           | 0 (0.0)                                        | 0 (0.0)                                                     | 0 (0.0)                                                       |
| <i>Other</i>             | 37 (18.1)                                      | 13 (10.4)                                                   | 24 (32.0)                                                     |

Supplementary Table 2. Presenting symptoms at diagnosis by GI-DLBCL subsite.

| GI-DLBCL LOCATION                           | Stomach ( <i>n</i> =124) | Small Intestine ( <i>n</i> =44) | Large Intestine ( <i>n</i> =23) |                       |
|---------------------------------------------|--------------------------|---------------------------------|---------------------------------|-----------------------|
| <b>INITIAL PRESENTATION</b><br><i>n</i> (%) | Obstruction***           | 5 (4.1%)                        | 11 (25%)                        | —                     |
|                                             | GI bleeding              | 19 (15.4%)                      | 5 (11.4%)                       | 4 (17.4%)             |
|                                             | Abdominal pain           | 45 (36.6%)                      | 13 (29.5%)                      | 8 (34.8%)             |
|                                             | GERD                     | 3 (2.4%)                        | —                               | 2 (8.7%)              |
|                                             | Perforation              | —                               | 2 (4.5%)                        | —                     |
|                                             | Nausea/vomiting          | 2 (1.6%)                        | 1 (2.3%)                        | —                     |
|                                             | Chronic anemia           | 1 (0.8%)                        | —                               | —                     |
|                                             | Weight loss              | —                               | —                               | 1 (4.3%)              |
|                                             | Misc.                    | —                               | —                               | 1 (4.3%) <sup>†</sup> |

\*\*\**p*<0.001, <sup>†</sup>Ulcerative colitis requiring elective colectomy upon which GI-DLBCL was identified

**Supplementary Table 3.** Radiation treatment details.

|                                |                                           | <b>All patients,<br/>n=65<br/>n (%)</b> | <b>Early stage<br/>DLBCL, n=54 (83.1%)<br/>n (%)</b> | <b>Advanced stage<br/>DLBCL, n=9 (13.8%)<br/>n (%)</b> |
|--------------------------------|-------------------------------------------|-----------------------------------------|------------------------------------------------------|--------------------------------------------------------|
| <b>Radiation intent</b>        | <b>Curative</b>                           | 55 (84.6)                               | 50 (92.6)                                            | 4 (44.4)                                               |
|                                | <b>Palliative</b>                         | 8 (12.3)                                | 4 (7.4)                                              | 4 (44.4)                                               |
|                                | <b>Missing</b>                            | 2 (3.1)                                 | 0 (0.0)                                              | 1 (11.1)                                               |
| <b>Radiation context</b>       | <b>Initial therapy (upfront)</b>          | 57 (87.7)                               | 52 (96.3)                                            | 4 (44.4)                                               |
|                                | <b>Disease recurrence</b>                 | 5 (7.7)                                 | 1 (1.9)                                              | 4 (44.4)                                               |
|                                | <b>Missing</b>                            | 3 (4.6)                                 | 1 (1.9)                                              | 1 (11.1)                                               |
|                                | <b>Consolidation</b>                      | 51 (78.5)                               | 47 (87.0)                                            | 2 (22.2)                                               |
|                                | <b>Gross disease</b>                      | 14 (21.5)                               | 7 (13.0)                                             | 6 (66.7)                                               |
|                                | <b>Missing</b>                            | 0 (0.0)                                 | 0 (0.0)                                              | 1 (11.1)                                               |
| <b>Site(s) of radiation</b>    | <b>Stomach</b>                            | 50 (76.9)                               | 45 (83.3)                                            | 2 (22.2)                                               |
|                                | <b>Small intestines</b>                   | 2 (3.1)                                 | 2 (3.7)                                              | 0 (0.0)                                                |
|                                | <b>Pancreas</b>                           | 1 (1.5)                                 | 1 (1.9)                                              | 0 (0.0)                                                |
|                                | <b>Abdomen/pelvis, nodes</b>              | 9 (13.8)                                | 8 (14.8)                                             | 1 (11.1)                                               |
|                                | <b>Other (thorax, scrotum, bone, CNS)</b> | 6 (9.2)                                 | 0 (0.0)                                              | 6 (66.7)                                               |
|                                | <b>Missing</b>                            | 1 (1.5)                                 | 0 (0.0)                                              | 1 (11.1)                                               |
| <b>Concurrent chemotherapy</b> | <b>Yes</b>                                | 0 (0.0)                                 | 0 (0.0)                                              | 0 (0.0)                                                |
|                                | <b>No</b>                                 | 63 (96.9)                               | 54 (100.0)                                           | 8 (88.9)                                               |
|                                | <b>Missing</b>                            | 2 (3.1)                                 | 0 (0.0)                                              | 1 (11.1)                                               |
| <b>Dose of RT</b>              | <b>Median (IQR)</b>                       | 36 (30.6-39.6)                          | 36 (30.6-39.6)                                       | 34 (30.5-37)                                           |
|                                | <b>Missing</b>                            | 7 (10.8)                                | 5 (9.3)                                              | 1 (11.1)                                               |
| <b>Fractionation</b>           | <b>Median (IQR)</b>                       | 18 (17-22)                              | 20 (17-22)                                           | 16.5 (15-15)                                           |
|                                | <b>Missing</b>                            | 7 (10.8)                                | 5 (9.3)                                              | 1 (11.1)                                               |
| <b>Technique</b>               | <b>2D/3D</b>                              | 33 (50.8)                               | 27 (50.0)                                            | 5 (55.6)                                               |
|                                | <b>IMRT/VMAT</b>                          | 25 (38.5)                               | 22 (40.7)                                            | 3 (33.3)                                               |
|                                | <b>Missing</b>                            | 9 (13.8)                                | 6 (11.1)                                             | 2 (22.2)                                               |

**Supplementary Table 4.** Multivariate analysis of patient, disease, and treatment factors associated with decrements in overall and progression-free survival among patients treated with rituximab.

| Characteristic      | OS HR      | 95% CI        | <i>p</i> -value  | PFS HR     | 95% CI       | <i>p</i> -value  |
|---------------------|------------|---------------|------------------|------------|--------------|------------------|
| <b>Stage</b>        |            |               |                  |            |              |                  |
| I                   | <i>Ref</i> |               |                  | <i>Ref</i> |              |                  |
| II                  | 12.2       | 1.34 – 112.34 | <b>0.027</b>     | 2.4        | 0.63 – 9.12  | 0.200            |
| III                 | 20.2       | 1.75 – 233.05 | <b>0.016</b>     | 7.1        | 1.65 – 30.35 | <b>0.008</b>     |
| IV                  | 12.9       | 1.62 – 102.22 | <b>0.016</b>     | 5.8        | 2.15 – 15.85 | <b>&lt;0.001</b> |
| <b>Achieved CR?</b> |            |               |                  |            |              |                  |
| Yes                 | 0.1        | 0.05 – 0.38   | <b>&lt;0.001</b> | 0.2        | 0.10 – 0.47  | <b>&lt;0.001</b> |

**Supplementary Table 5.** Multivariate analysis of patient, disease, and treatment factors associated with decrements in progression-free survival among patients treated with combined modality therapy.

| Characteristic      | PFS <sup>†</sup> HR | 95% CI        | <i>p</i> -value |
|---------------------|---------------------|---------------|-----------------|
| <b>Achieved CR?</b> |                     |               |                 |
| Yes                 | 0.02                | 0.002 – 0.254 | <b>0.002</b>    |

<sup>†</sup>No variables associated with OS decrements among the CMT cohort (*n*=55), hence only PFS is shown

**Supplementary Table 6.** Late treatment-related complications by GI-DLBCL subsite.

| GI-DLBCL LOCATION                             | Stomach ( <i>n</i> =124) | Small Intestine ( <i>n</i> =44)                                                                                                                    | Large Intestine ( <i>n</i> =23)                                                                  |                                     |
|-----------------------------------------------|--------------------------|----------------------------------------------------------------------------------------------------------------------------------------------------|--------------------------------------------------------------------------------------------------|-------------------------------------|
| <b>TREATMENT COMPLICATION</b><br><i>n</i> (%) | Perforation              | 3 (2.4%)                                                                                                                                           | 1 (2.3%)                                                                                         | —                                   |
|                                               | Obstruction              | 8 (6.5%)                                                                                                                                           | 5 (11.4%)                                                                                        | 2 (8.7%)                            |
|                                               | Bleeding                 | 4 (3.2%)                                                                                                                                           | 4 (9.1%)                                                                                         | 1 (4.3%)                            |
|                                               | Pyloric Stenosis         | 1 (0.8%)                                                                                                                                           | —                                                                                                | —                                   |
|                                               | Malabsorption            | 1 (0.8%)                                                                                                                                           | —                                                                                                | —                                   |
|                                               | Chronic Anemia           | 1 (0.8%)                                                                                                                                           | 4 (9.1%)                                                                                         | 2 (8.7%)                            |
|                                               | Dysphagia                | 1 (0.8%)                                                                                                                                           | —                                                                                                | —                                   |
|                                               | Fistula                  | —                                                                                                                                                  | 1 (2.3%)                                                                                         | 1 (2.3%)                            |
|                                               | Surgical Intervention    | <b><i>n</i>=9</b> ; Dilation ( <i>n</i> =1), Partial gastrectomy ( <i>n</i> =2), Jejunostomy or Gastrostomy ( <i>n</i> =2), Unknown ( <i>n</i> =4) | <b><i>n</i>=4</b> ; Venting Tube/J-tube/gastrojejunostomy ( <i>n</i> =1), Unknown ( <i>n</i> =3) | Not specified ( <b><i>n</i>=2</b> ) |
